# Supplementary material for: Strong Coupling of Folded Phonons with Plasmons in 6H-SiC Micro/Nanocrystals
Source: MDPI journal article supplement (doi:10.3390/molecules23092296), 2018-09-08
Supplement: s1 [file s1]

Supporting Information

**Strong Coupling of Folded Phonons with Plasmons in 6H-SiC**

**Micro/Nanocrystals**

**Yao Huang<sup>1</sup>, Run Yang<sup>1,\*</sup>, Shijie Xiong<sup>1</sup>, Jian Chen<sup>2</sup>, and Xinglong Wu<sup>1,\*</sup>**

<sup>1</sup> National Laboratory of Solid State Microstructures and School of Physics, Nanjing

University, Nanjing 210093, P. R. China; 550549045@qq.com;

sjxiong@nju.edu.cn;

<sup>2</sup> National Laboratory of Solid State Microstructures and Research Institute of

Superconductor Electronics, Nanjing University, Nanjing 210093, China;

chenj63@nju.edu.cn

\* Correspondence: 1225536206@qq.com (R.Y); hkxlu@nju.edu.cn (X.L.W); Tel.:

0086-25-83686303

## Calculation of Raman spectrum

The effective driving fields  $D_{LO(TO),i}$  transfer power to the medium as follows:

$$P = 2\omega V \operatorname{Im} \left( \sum_i (\mu_{LO,i} D_{LO,i}^* P_{LO,i} + \mu_{TO,i} D_{TO,i}^* P_{TO,i}) + \mu_e D_e^* P_e \right),$$

where  $\mu_{LO(TO),i}$  and  $\mu_e$  are weights contributed from the  $i$ th FLO (FTO) mode and plasmons, respectively, and  $V$  is the involved medium volume. In Raman scattering,

the power scattered into a mode of the Raman field at frequency  $\omega_{out}$  is related to  $P$  by  $P_{out} = \omega_{out} P / \omega$ . Hence, the power scattered into a solid angle  $d\Omega$  and frequency

range  $d\omega_{out}$  is  $dP_{out} = \frac{V_{out} n_{out}^3 \omega_{out}^2 P_{out}}{(2\pi c)^3} d\omega_{out} d\Omega$ , where  $c$  is the light velocity, and

$n_{out}$  and  $V_{out}$  are the refractive index and volume of outgoing medium, respectively.

The differential Raman efficiency has the relationship of:

$$\frac{d^2 R}{d\omega d\Omega} \propto \operatorname{Im} \left( \sum_i (\mu_{LO,i} D_{LO,i}^* P_{LO,i} + \mu_{TO,i} D_{TO,i}^* P_{TO,i}) + \mu_e D_e^* P_e \right).$$

Accordingly, together with the solved polarizations from equations in the main text for the given effective driving fields, the relative Raman intensities can be calculated as a function of frequencies.

## Surface modification

After ethanol treatment, it can be seen that the Raman spectrum after treatment has two new peaks, at 776 and 927.5  $\text{cm}^{-1}$  respectively, and the Raman peaks at 882.5  $\text{cm}^{-1}$  have been significantly improved compared to the untreated sample. The 776  $\text{cm}^{-1}$  Raman peak should belong to the FTO (2/3) mode and the 927.5  $\text{cm}^{-1}$  Raman peak should belong to the FLO (2/3) mode. It can be seen that by the surface modification of

6H-SiC, all the eight 6H-SiC FTO modes and FLO modes predicted by the theory appear, which may be associated with the introduction of ethanol to the hybridization of 6H-SiC electrons from SP3 orbits to SP2 orbitals, and a more active pi bond electrons will form plasmons under laser excitation. And at last leads to the plasmon phonon coupling, which enhanced the intensities of weak modes.

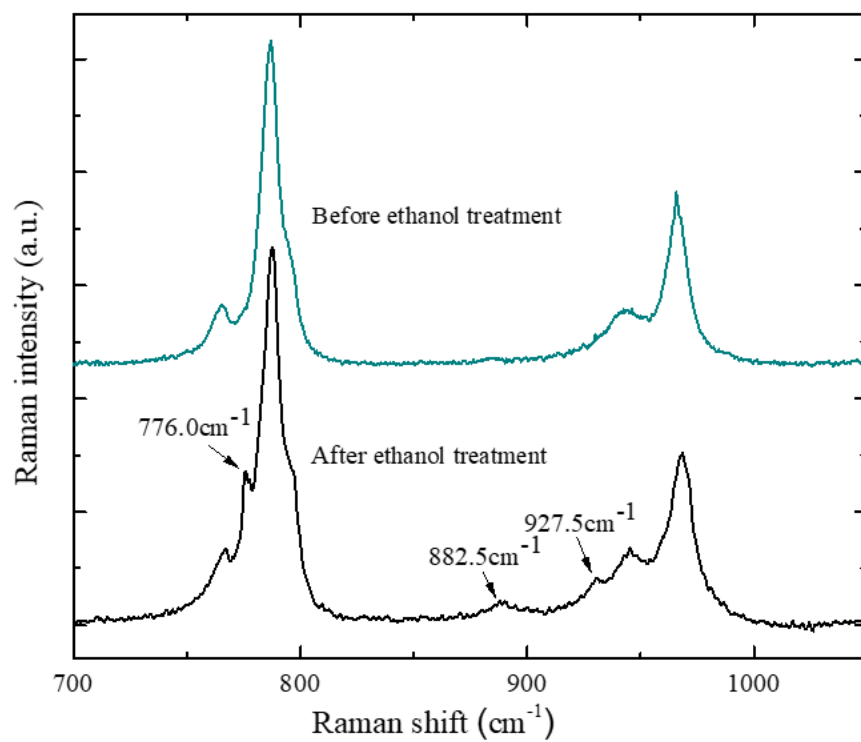

**Figure S1.** Comparison of Raman spectra of 6H-SiC with/without ethanol treatment.

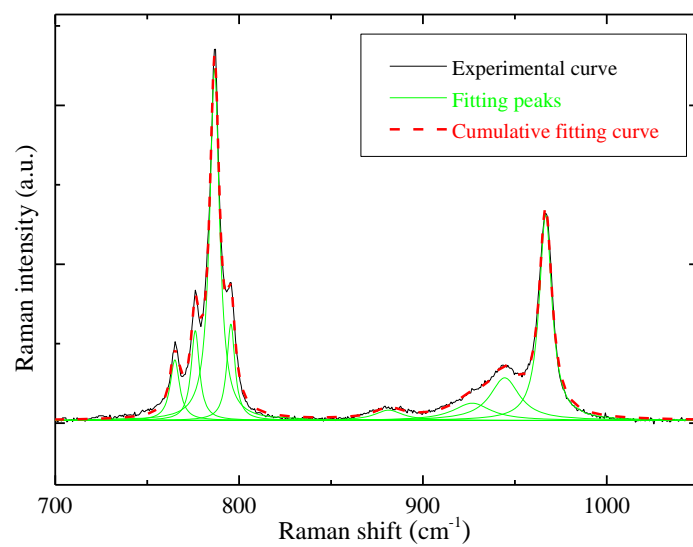

**Figure S2.** Raman spectra and Lorentzian fitted peaks of the 0.5  $\mu\text{m}$  thick film with a mean size of 1.25  $\mu\text{m}$ .

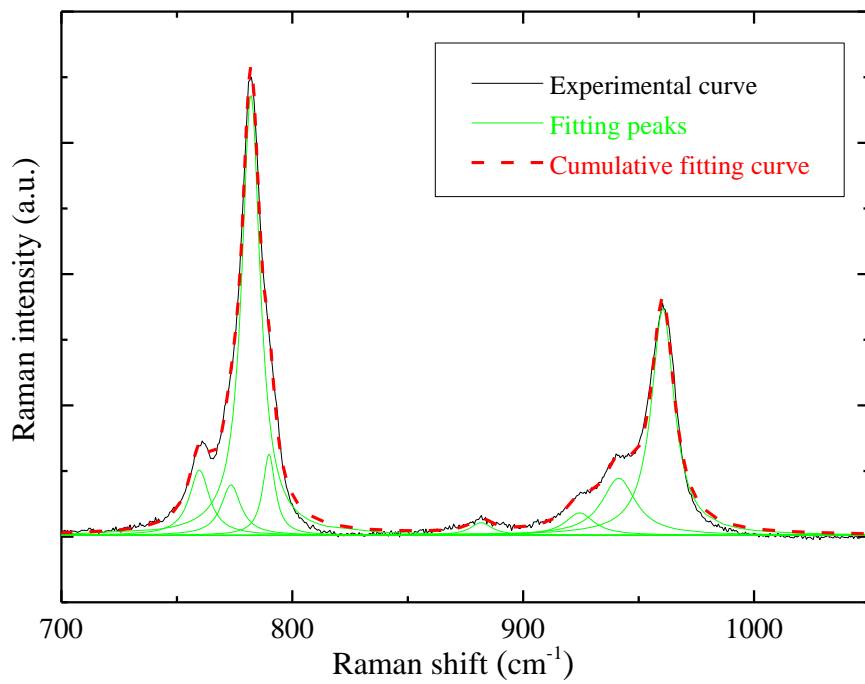

**Figure S3.** Raman spectra and Lorentzian fitted peaks of the 1.5  $\mu\text{m}$  thick film with a mean size of 1.25  $\mu\text{m}$ .

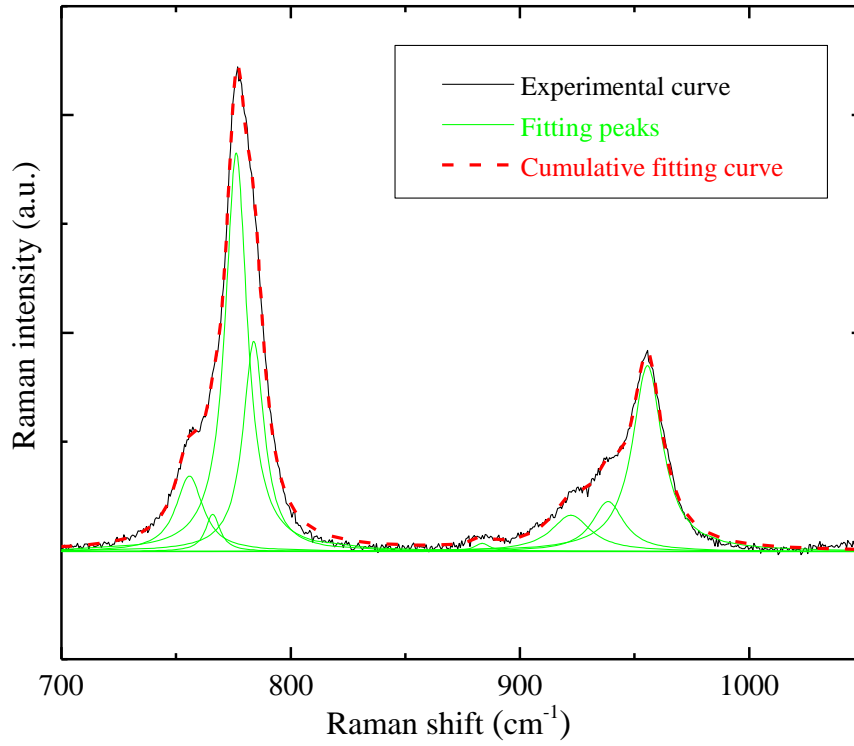

**Figure S4.** Raman spectra and Lorentzian fitted peaks of the 2.6  $\mu\text{m}$  thick film with a mean size of 1.25  $\mu\text{m}$ .

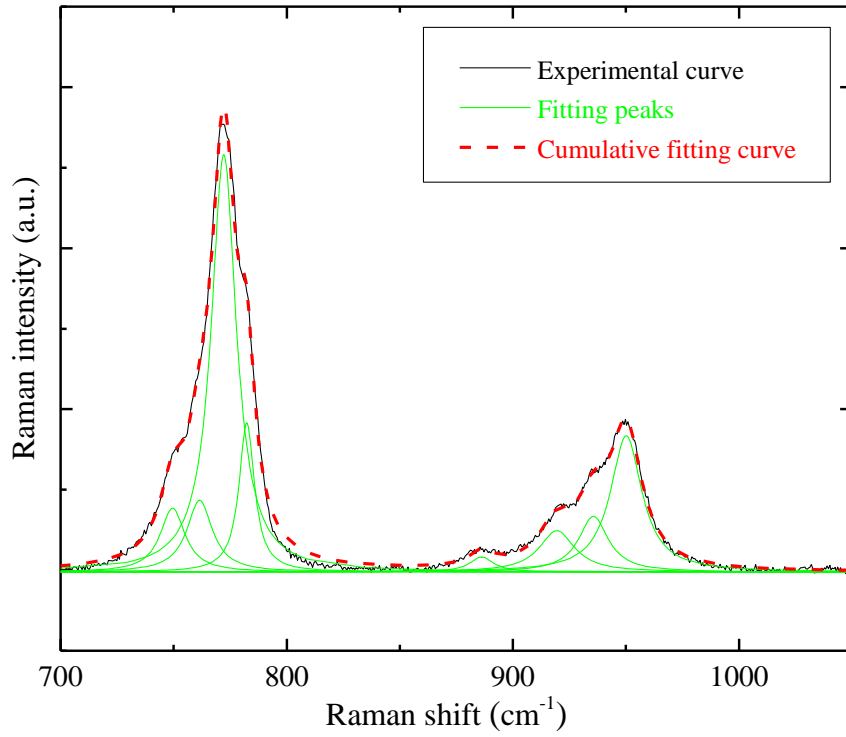

**Figure S5.** Raman spectra and Lorentzian fitted peaks of the 3.6  $\mu\text{m}$  thick film with a mean size of 1.25  $\mu\text{m}$ .



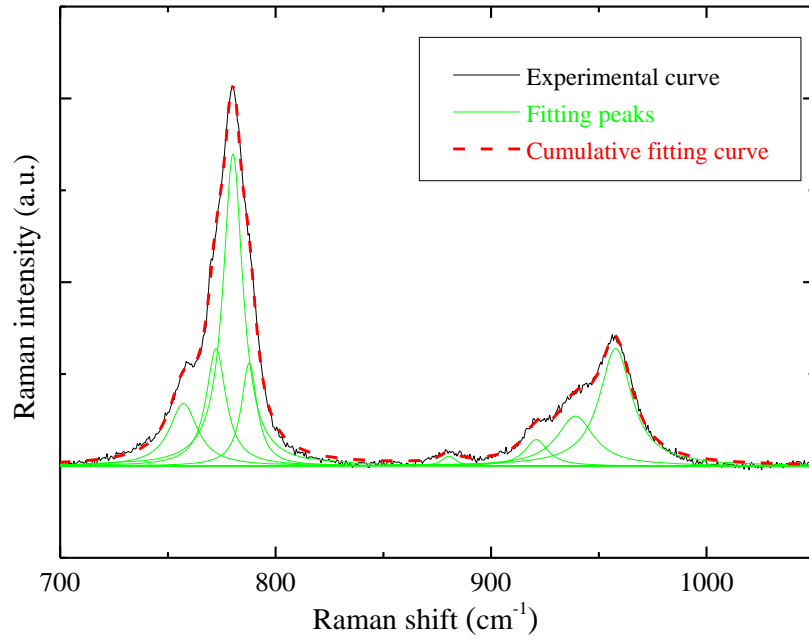

**Figure S6.** Raman spectra and Lorentzian fitted peaks of the 1.5  $\mu\text{m}$  thick film with a mean size of 0.55  $\mu\text{m}$ .

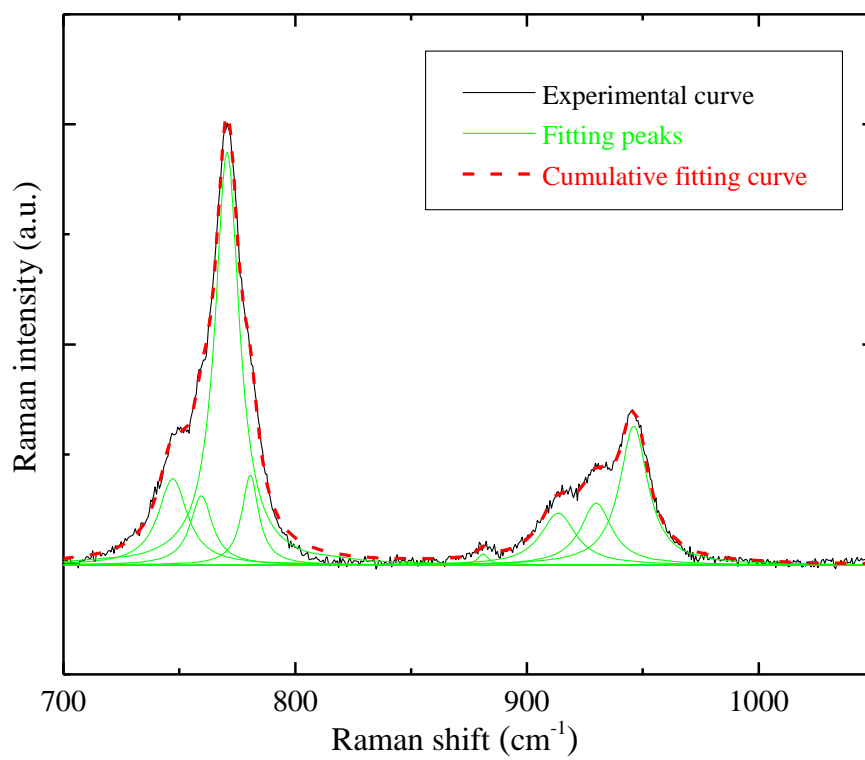

**Figure S7.** Raman spectra and Lorentzian fitted peaks of the 3.6  $\mu\text{m}$  thick film with a mean size of 0.55  $\mu\text{m}$ .
